# Supplementary material
Source: Springer Nature journal article supplement (https://www.springermedizin.de/resource/supplementary/12939_2011_203_MOESM5_ESM.pdf/9550588)

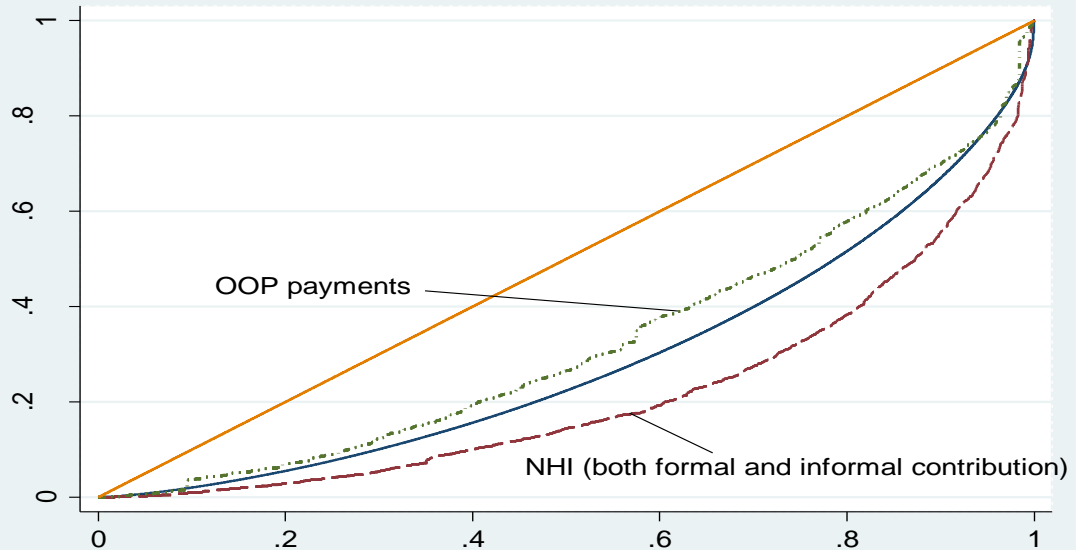

— Lorenz (y)      - - - National health insurance  
- · - · - out-of-pocket      — 45 degree line

Supplement: MOESM5 [file 9550588]
